# Supplementary material for: Impact of the implementation of a standard for preanalytical handling of samples for microbiological diagnostics on the quality of results at a neurocritical care unit
Source: PubMed Central journal article supplement (PMC10545238; doi:10.1097/md.0000000000027060), 2021-08-27
Supplement: medi-100-e27060-s001.pdf [file medi-100-e27060-s001.pdf]

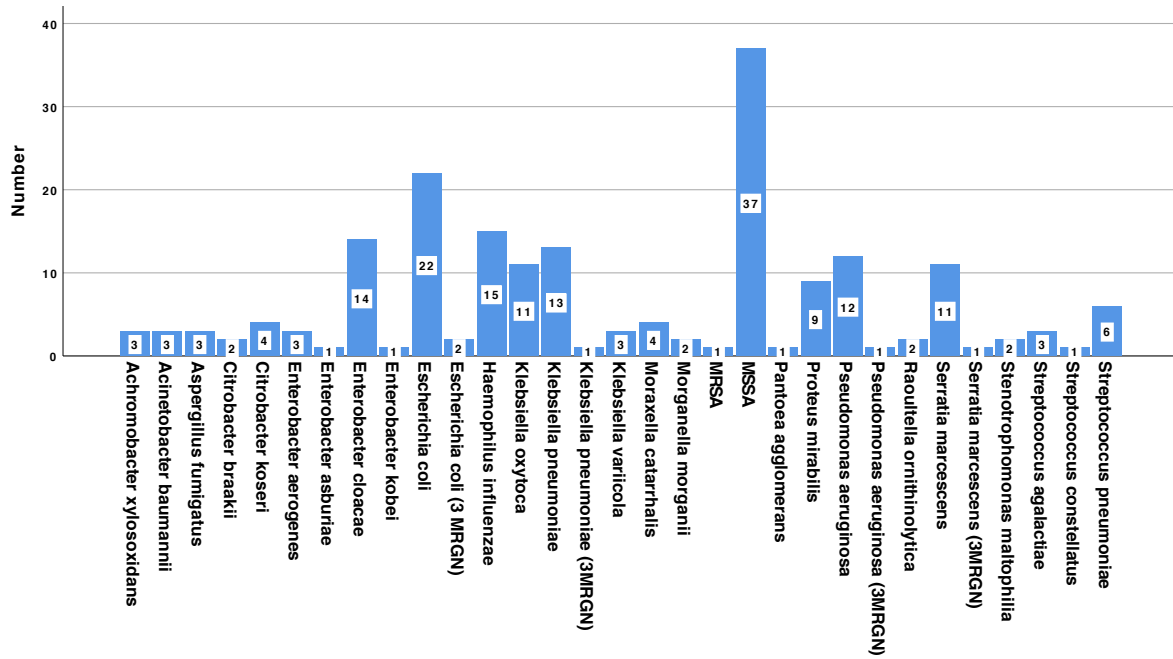

*Detected germs and their frequency in all respiratory material taken from the patients of the historical as well as the SOP group. MRSA = methicillin-resistant Staphylococcus aureus, MSSA = methicillin-sensitive Staphylococcus aureus, MRGN = multidrug-resistant gram-negative bacteria.*
