# Supplementary material for: Impact of the implementation of a standard for preanalytical handling of samples for microbiological diagnostics on the quality of results at a neurocritical care unit
Source: PubMed Central journal article supplement (PMC10545238; doi:10.1097/md.0000000000027060), 2021-08-27
Supplement: medi-100-e27060-s003.pdf [file medi-100-e27060-s003.pdf]

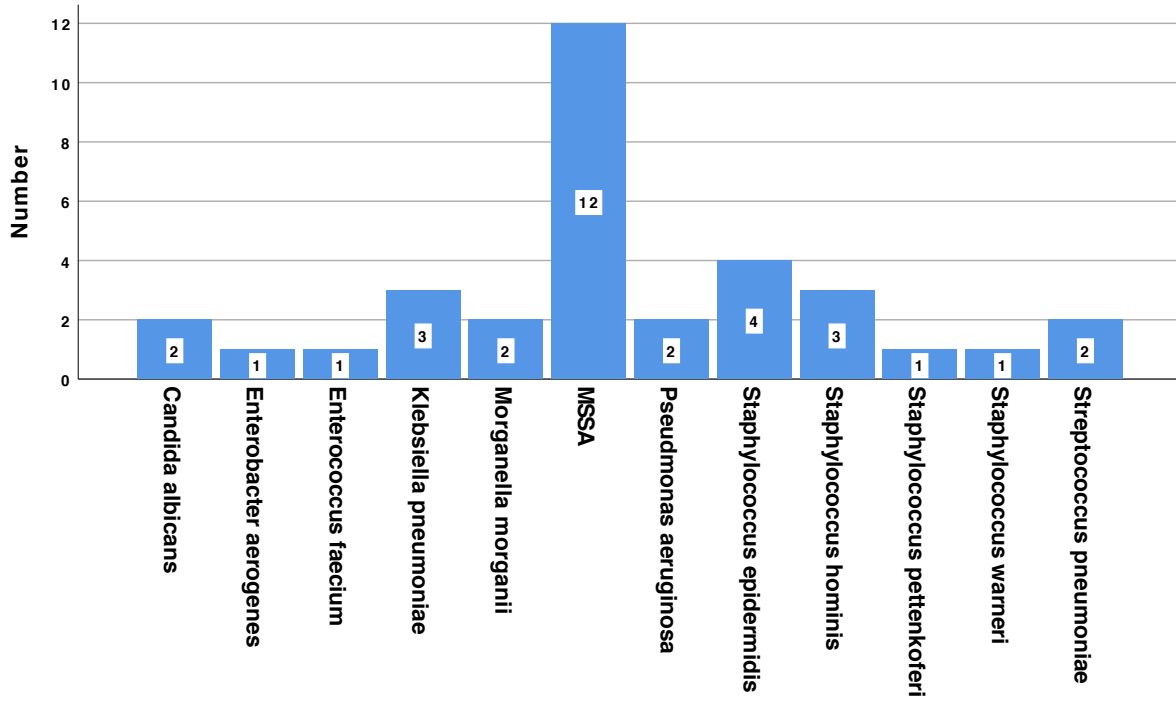

*Detected germs and their frequency in all blood cultures taken from the patients of the historical as well as the SOP group. MSSA = methicillin-sensitive Staphylococcus aureus.*
